1 **The microbiome and resistome of hospital sewage during passage**  
2 **through the community sewer system**

3

4 Elena Buelow<sup>1,2\*</sup>, Jumamurat R. Bayjanov<sup>1</sup>, Rob J.L. Willems<sup>1</sup>, Marc J.M. Bonten<sup>1</sup>,  
5 Heike Schmitt<sup>3</sup> and Willem van Schaik<sup>1,4</sup>

6

7 <sup>1</sup>Department of Medical Microbiology, University Medical Center Utrecht, Utrecht, The  
8 Netherlands

9 <sup>2</sup>Université Limoges, INSERM, CHU Limoges, UMR 1092, Limoges, France

10 <sup>3</sup>National institute for public health and the environment (RIVM), Bilthoven, The Netherlands

11 <sup>4</sup>Institute of Microbiology and Infection, University of Birmingham, United Kingdom

12

13 \*Corresponding Author: Université Limoges, INSERM, CHU Limoges, UMR 1092, Agents  
14 antimicrobiens Faculté de médecine, 2 rue du Dr Marcland, Limoges, France.  
15 Tel : +33519910564262. Email. [elena.buelow@gmail.com](mailto:elena.buelow@gmail.com)

16

17

18

19

20

21 Abstract

22 Effluents from wastewater treatment plants (WWTPs) have been proposed to act as  
23 point sources of antibiotic-resistant bacteria (ARB) and antimicrobial resistance genes  
24 (ARGs) in the environment. Hospital sewage may contribute to the spread of ARB and  
25 ARGs as it contains the feces and urine of hospitalized patients, who are more  
26 frequently colonized with multi-drug resistant bacteria than the general population.  
27 However, whether hospital sewage noticeably contributes to the quantity and diversity of  
28 ARGs in the general sewerage system has not yet been determined.

29 Here, we employed culture-independent techniques, namely 16S rRNA and nanolitre-  
30 scale quantitative PCRs, to describe the role of hospital effluent as a point source of  
31 ARGs in the sewer system, through comparing microbiota composition and levels of  
32 ARGs in hospital sewage with WWTP influent, WWTP effluent and the surface water in  
33 which the effluent is released.

34 Compared to other sample sites, hospital sewage was richest in human-associated  
35 bacteria and contained the highest relative levels of ARGs. Yet, the abundance of ARGs  
36 was comparable in WWTPs with and without hospital wastewater, suggesting that  
37 hospitals do not contribute to the spread of ARGs in countries with a functioning  
38 sewerage system.

## 39 **Introduction**

40 Antibiotic-producing and antibiotic-resistant bacteria (ARB) naturally and ubiquitously  
41 occur in the environment (Anukool *et al.*, 2004; Wellington *et al.*, 2013). However,  
42 human activities contribute importantly to the dissemination of resistant bacteria and  
43 resistance genes from humans and animals to the environment (Woolhouse & Ward,  
44 2013). Effluents of wastewater treatment plants (WWTPs) may represent an important  
45 source of ARB and antimicrobial resistance genes (ARGs) in the aquatic environment  
46 (LaPara *et al.*, 2011; Wellington *et al.*, 2013; Pruden *et al.*, 2013; Rizzo *et al.*, 2013;  
47 Stalder *et al.*, 2014; Pruden, 2014; Czekalski *et al.*, 2014; Blaak *et al.*, 2014; Karkman *et*  
48 *al.*, 2016; Karkman *et al.*, 2017). Generally, WWTPs collect municipal wastewater, but  
49 also wastewater from industry, farms and hospitals, dependent on the size and nature of  
50 the communities connected to a single sewer system. In hospitals, up to one third of  
51 patients receive antibiotic therapy on any given day and consequently, hospitals may be  
52 important hubs for the emergence and spread of ARB and ARGs (Vlahovic-Palcevski *et*  
53 *al.*, 2007; Bush *et al.*, 2011; Robert *et al.*, 2012). Recent studies have highlighted that  
54 multidrug-resistant nosocomial pathogens, ARGs and genetic determinants that  
55 contribute to the mobilization and dissemination of ARGs are abundant in hospital  
56 sewage, indicating that hospital sewage may play a role in the dissemination of bacteria  
57 and genetic determinants involved in antibiotic resistance (Kummerer, 2001; Borjesson  
58 *et al.*, 2009; Stalder *et al.*, 2013; Varela *et al.*, 2013; Stalder *et al.*, 2014; Brechet *et al.*,  
59 2014).

60 Whether hospital effluent contributes to the presence of ARGs in the aquatic  
61 environment is still poorly understood. To quantify the role of hospital effluent as a point

62 source of ARGs in the sewer system, we compared the levels of ARGs in hospital  
63 sewage with WWTP influent, WWTP effluent and the surface water in which the effluent  
64 is released. In addition, we investigated the microbial composition along this sample  
65 gradient, in order to follow the fate of intestinal microbiota as sources of ARGs.

66

## 67 **Materials and Methods**

68

### 69 **Sampling locations**

70 Sampling was conducted at the main hospital wastewater pipe of the University Medical  
71 Center Utrecht (UMCU), Utrecht in the Netherlands, and at two WWTP plants. One plant  
72 (termed 'urban WWTP' in this manuscript) treats wastewater of approximately 290,000  
73 inhabitants of the city of Utrecht, including the investigated hospital and two other  
74 hospitals. The other plant ('suburban WWTP' in Lopik, the Netherlands) neither serves a  
75 hospital nor a retirement or nursing home, and treats wastewater of a suburban  
76 community of approximately 14,000 inhabitants (Supplementary Figure 1). Both plants  
77 apply secondary treatment including nitrification and denitrification in activated sludge  
78 systems. Phosphorus removal is performed chemically in the urban WWTP, and  
79 biologically in the suburban WWTP. The hospital has approximately 1,000 beds and  
80 8,200 employees (full-time equivalents). Additionally, some 2,500 students are enrolled  
81 at the university hospital.

### 82 **Sampling and DNA isolation**

83 Samples were taken during a period of 2.5 weeks in spring on four days (Monday 31  
84 March 2014; Wednesday 2 April 2014; Monday 7 April 2014 and Monday 14 April 2014).  
85 Cumulative precipitation in the three days preceding each sampling date amounted to  
86 maximally 15 mm. The daily flows amount to  $74,800 \pm 5,900 \text{ m}^3$  for the urban WWTP,  
87 and  $3,390 \pm 380 \text{ m}^3$  for the suburban WWTP during the four sampling days. The flows of  
88 the academic hospital amount to approximately  $216,000 \text{ m}^3$  on a yearly basis, i.e. on  
89 average  $590 \text{ m}^3$  per day (0.8% of the influent of the urban WWTP). Exact quantification

90 of the flows of the academic hospital is not possible as the daily flows are not regularly  
91 registered. Flow-proportional sampling (over 24 hours) was used for sampling hospital  
92 wastewater and WWTP influent and effluent. Samples were kept at 4°C during the flow-  
93 proportional sampling. For the surface water samples, grab samples (5 L) were taken at  
94 50 cm downstream of the two effluent pipes of the urban WWTP discharging into a local  
95 river at a depth of 20 cm. Samples were transported to the laboratory at 4°C and  
96 samples were processed the same day. Bacterial cell pellets and debris of sewage and  
97 surface water samples were collected by means of centrifugation at 14000 *g* for 25  
98 minutes. All pellets were resuspended in phosphate buffered saline (PBS; 138 mM  
99 NaCl, 2.7 mM KCl, 140 mM Na<sub>2</sub>HPO<sub>4</sub>, 1.8 mM KH<sub>2</sub>PO<sub>4</sub>, adjusted to pH 7.4 with HCl)  
100 with 20% glycerol and stored at -80 C° until DNA extraction. Metagenomic DNA was  
101 extracted from 200 µl of frozen samples as described previously (Godon *et al.*, 1997).

## 102 **16S rRNA sequencing and sequence data pre-processing**

103 16S rRNA sequencing was performed on the Illumina MiSeq sequencing platform (San  
104 Diego, CA). A dual-indexing approach for multiplex 16S rRNA sequencing targeting the  
105 V3-V4 hypervariable region of the 16S rRNA gene was employed as described by  
106 (Fadrosh *et al.*, 2014), using the 300 bp paired-end protocol to sequence a pool of 24  
107 samples. Untrimmed paired-end reads were assembled using the FLASH assembler,  
108 which performs error correction during the assembly process (Magoc & Salzberg, 2011).  
109 After removal of the barcodes, heterogeneity spacers, and primer sequences, there  
110 were a total of 1.4 million joined reads with a median length of 424 bases and a median  
111 number of 57860 joined reads per sample.

## 112 **16S rRNA sequence data analysis**

113 Joined reads were further analyzed using the QIIME microbial community analysis  
114 pipeline (version 1.8.0) (Caporaso, Kuczynski *et al.*, 2010). Joined reads with a minimum  
115 of 97% similarity were assigned into operational taxonomic units (OTUs) using QIIME's  
116 open-reference OTU calling workflow. This workflow was used with the “-m usearch61”  
117 option, which uses the USEARCH algorithm (Edgar, 2010) for OTU picking and  
118 UCHIME for chimeric sequence detection (Edgar *et al.*, 2011). Taxonomic ranks for  
119 OTUs were assigned using the Greengenes database (version 13.8) (McDonald *et al.*,  
120 2012) with the default parameters of the script `pick_open_reference_otus.py`. A  
121 representative sequence of each OTU was aligned to the Greengenes core reference  
122 database (DeSantis *et al.*, 2006) using the PyNAST aligner (version 1.2.2) (Caporaso,  
123 Bittinger *et al.*, 2010). Highly variable parts of alignments were removed using the  
124 `filter_alignment.py` script, which is part of the `pick_open_reference_otus.py` workflow.  
125 Subsequently, filtered alignment results were used to create an approximate maximum-  
126 likelihood phylogenetic tree using FastTree (version 2.1.3) (Price *et al.*, 2010). For more  
127 accurate taxa diversity distribution (Bokulich *et al.*, 2013), OTUs to which less than  
128 0.005% of the total number of assembled reads were mapped, were discarded using the  
129 `filter_otus_from_otu_table.py` script with the parameter “--min\_count\_fraction 0.00005”.  
130 The filtered OTU table and generated phylogenetic tree were used to assess within-  
131 sample (alpha) and between sample (beta) diversities.

132 Alpha- and beta-diversity of samples were assessed using QIIME's  
133 `core_diversity_analyses.py` workflow. For rarefaction analysis the subsampling depth  
134 threshold of 20681 was used, which was the minimum number of reads assigned to a

135 sample. The UniFrac distance was used as input to calculate the Chao1 index as a  
136 measure of beta-diversity of the samples (C. Lozupone & Knight, 2005). In addition to  
137 alpha- and beta-diversity analysis and visualizations, this workflow also incorporates  
138 principal coordinates analysis and visualization of sample compositions using Emperor  
139 (Vazquez-Baeza *et al.*, 2013). Differences in the abundance of taxa are shown as  
140 averages over the four time points  $\pm$  standard deviation resulting in six different  
141 comparisons between the different samples. The non-parametric Mann-Whitney test  
142 was used to test for statistical significance.

143

#### 144 **High-throughput qPCR**

145 Real-Time PCR analysis was performed using the 96.96 BioMark™ Dynamic Array for  
146 Real-Time PCR (Fluidigm Corporation, San Francisco, CA, U.S.A), according to the  
147 manufacturer's instructions, with the exception that the annealing temperature in the  
148 PCR was lowered to 56°C.

149 Other technical details of the nanolitre-scale quantitative PCRs to quantify levels of  
150 genes that confer resistance to antimicrobials (antibiotics and disinfectants, specifically  
151 quaternary ammonium compounds (QACs)) were described previously (Buelow *et al.*,  
152 2017), with some modifications in the collection of primers. Primers that were negative  
153 for all samples tested in the previous study, or gave unspecific amplification were  
154 redesigned or replaced. The primer sequences and their targets are provided in the  
155 supplementary data, updated and novel primers and targets are highlighted with a grey  
156 background (Supplementary Table 1).

157



158 **Calculation of normalized abundance and cumulative abundance**

159 Normalized abundance of resistance genes was calculated relative to the abundance of  
160 the 16S rRNA gene ( $CT_{ARG} - CT_{16S\ rRNA}$ ) resulting in a log<sub>2</sub>-transformed estimate of  
161 ARG abundance. Cumulative abundance was calculated based on the sum of the non-  
162 log<sub>2</sub> transformed values ( $2^{-(CT_{ARG} - CT_{16S\ rRNA})}$ ) of all genes within a resistance gene  
163 family. The differences in cumulative abundance over all time points are shown as an  
164 averaged fold-change  $\pm$  standard deviation. The non-parametric Mann-Whitney test was  
165 used to test for significance; p values were corrected for multiple testing by the  
166 Benjamin-Hochberg procedure (Benjamini & Hochberg, 1995) with a false discovery rate  
167 of 0.05.

168

## 169 Results

### 170 Composition of the microbiota of hospital sewage, WWTP influent, WWTP effluent 171 and river water.

172 The composition of the microbiota in hospital sewage, urban and suburban WWTP  
173 influents, the effluent of the urban WWTP and the surface water in which the effluent  
174 was released was determined by multiplexed 16S rRNA sequencing on the Illumina  
175 MiSeq platform (Figure 1A and Supplementary Table 2). At all sample sites, the  
176 microbiota consisted of a complex consortium of bacteria from different orders with the  
177 microbiota being most diverse in the river samples and least diverse in hospital sewage  
178 (Supplementary Figure 2). Hospital sewage contained relatively high levels ( $39.4 \pm 2.5\%$   
179 standard deviation, of the total microbiota) of anaerobic bacteria (Bifidobacteriales,  
180 Bacteroidales and Clostridiales) that are likely to originate from the human gut (Rajilic-  
181 Stojanovic & de Vos, 2014). These orders were less abundant in WWTP influent ( $25.8 \pm$   
182  $8.4\%$ ) and suburban WWTP influent ( $27 \pm 3\%$ ;  $p < 0.05$ ) compared to hospital sewage.  
183 Compared to the WWTP influent, abundance of Bifidobacteriales, Bacteroidales and  
184 Clostridiales was significantly ( $p < 0.05$ ) lower in WWTP effluent ( $12.8 \pm 2.5\%$ ) and river  
185 water ( $7.0 \pm 1.3\%$  for site 1 and  $10.6 \pm 1.6\%$  for site 2). In contrast, bacteria that are  
186 associated with activated sludge (such as the Actinomycetales, Rhodocyclales, and  
187 Burkholderiales (Zhang *et al.*, 2012)) became more prominent during passage through  
188 the sewer system and WWTP (Figure 1A and Supplementary Table 2). Principal  
189 coordinates analysis (PCoA) showed a clear distinction between the samples that were  
190 isolated prior to treatment in the WWTP and the samples of WWTP effluent and river  
191 water (Figure 1B). The three most abundant bacterial taxa detected in the hospital  
192 sewage were the genera *Streptococcus* (9.0%) and *Arcobacter* (6.9%) and the family

193 Ruminococcaceae (6.3%). Both raw sewage influents (urban WWTP influent, suburban  
194 WWTP influent) clustered together and in both sites, the same three bacterial taxa were  
195 most abundant (*Arcobacter*: 17.9% in urban WWTP influent; 17.5% in suburban WWTP  
196 influent; Aeromonadaceae: 11.2% and 12.4% respectively; Carnobacteriaceae, 9.4%  
197 and 8.3% respectively). Variation of the microbiota composition between the different  
198 samples dates at the six sites was limited; with the urban WWTP influent and effluent  
199 exhibiting the most pronounced fluctuations (Figure 1b). The urban WWTP effluent  
200 samples were very similar to the surface water samples that were collected close to the  
201 effluent release pipes. Urban WWTP effluent shared the same three most common  
202 OTUs with one of the surface water samples (Actinomycetales, 15.4% in urban WWTP  
203 effluent and 9.7% in river site 2; Procabacteriaceae, 8.1% and 7.1% respectively;  
204 Comamonadaceae, 7.6% and 7.7% respectively). The surface water sample collected at  
205 the other release pipe (river site 1) was slightly different and is defined by the following  
206 three most abundant OTUs: Comamonadaceae, 7.5%, Intrasporangiaceae, 6.1% and  
207 *Candidatus Microthrix*, 6.1%.

## 208 **Resistome composition of hospital sewage compared to receiving urban sewage**

209 A total of 67 ARGs were detected in the different samples, conferring resistance to 13  
210 classes of antimicrobials. The levels of ARGs were calculated as a normalized  
211 abundance relative to levels of 16S rRNA, which provides an indication of the relative  
212 levels of ARGs within the bacterial population in each sample (Figure 2, Supplementary  
213 Table 3). Hospital sewage was found to be enriched in ARGs, compared to the other  
214 samples. The normalized abundance of 11 out of 13 classes of ARGs was significantly  
215 ( $p < 0.05$ ) higher in hospital sewage than in the urban WWTP influent, particularly so for

216 aminoglycoside ( $12.0 \pm 5.0$ -fold higher in hospital sewage),  $\beta$ -lactam ( $15.4 \pm 3.6$ -fold  
217 higher in hospital sewage) and vancomycin resistance genes ( $175 \pm 14$ -fold higher in  
218 hospital sewage, based on the three days when vancomycin resistance genes could be  
219 detected in the WWTP influent). Only one class of resistance genes (conferring  
220 resistance to streptogramins) was significantly less abundant ( $p < 0.05$ ) in hospital  
221 sewage than in WWTP influent. The combined levels of chloramphenicol and quinolone  
222 resistance genes were not different between the sites. Seven ARGs (two  
223 aminoglycoside resistance genes, *aph(2'')-Ib* and *aph(2'')-I(de)*, the quinolone resistance  
224 gene *qnrA*, the erythromycin resistance gene *ermC*, the vancomycin resistance gene  
225 *vanB*, the AmpC-type  $\beta$ -lactamases *bla<sub>DHA-1</sub>* and *bla<sub>CMY-2</sub>* and the carbapenemase  
226 *bla<sub>NDM</sub>*) were only detected in hospital sewage (Figure 2). The abundance of ARGs in the  
227 urban WWTP influent, which receives sewage from the sampled hospital and two  
228 additional hospitals in the same city, and the suburban WWTP influent is comparable  
229 (Figure 2 Supplementary Table 3). For nine classes of antibiotics, (aminoglycosides,  $\beta$ -  
230 lactams, chloramphenicols, macrolides, polymyxins, puromycins, trimethoprim,  
231 quinolones, and tetracyclines), the levels of ARGs in the urban WWTP effluent were  
232 significantly ( $p < 0.05$ ) lower than in the WWTP influent (ranging between a  $7.6 \pm 2.2$ -fold  
233 reduction for macrolide and intrinsic (efflux) resistance genes to a  $2.8 \pm 0.9$ -fold  
234 reduction for  $\beta$ -lactam resistance genes), with the remaining classes of ARGs not  
235 changing significantly in abundance (Figure 2 and Supplementary Table 3). The levels of  
236 ARGs in WWTP effluent were comparable to the levels of ARGs in river water (Figure 2,  
237 Supplementary Table 3).

238

## 239 **Discussion**

240 Our study demonstrates the considerable efflux of ARGs from hospitals through sewage.  
241 However, the influents of the urban and suburban WWTPs studied here show very  
242 similar levels of ARGs, even though the urban WWTP receives sewage from a variety of  
243 sources including three hospitals, while the sub-urban WWTP does not have a hospital  
244 in its catchment area. This reflects the relatively limited effect of hospital sewage on the  
245 level of ARGs in WWTP influent and the low contribution of hospital sewage (an  
246 estimated 0.8%) to the total volume of wastewater treated in the urban WWTP that we  
247 investigated. Our study further demonstrates the capacity of WWTPs to reduce the  
248 ultimate amount of ARGs present in urban and suburban influent before entering the  
249 river systems.

250 Effluents from WWTPs are thought to contribute to the dissemination of pollutants, multi-  
251 drug resistant bacteria and resistance genes in the environment (Rizzo *et al.*, 2013;  
252 Wellington *et al.*, 2013; Karkman *et al.*, 2017). Particularly high amounts of ARB have  
253 previously been reported in hospital sewage (Diwan *et al.*, 2010; Wellington *et al.*, 2013;  
254 Harris *et al.*, 2013; Harris *et al.*, 2014; Berendonk *et al.*, 2015). Large amounts of  
255 antibiotics and QACs are used in hospitals and these may promote the establishment of  
256 ARB and selection of ARGs in patients and hospital wastewaters (Stalder *et al.*, 2013;  
257 Stalder *et al.*, 2014; Varela *et al.*, 2014). Here we show that the relative abundance of a  
258 broad range of ARGs conferring resistance to 11 classes of antimicrobials is significantly  
259 higher in hospital sewage compared to urban and suburban WWTP sewage. In  
260 particular, genes conferring resistance to aminoglycosides,  $\beta$ -lactams and vancomycin

261 are enriched in hospital sewage, presumably due to the frequent use of these classes of  
262 antibiotics in the hospital (Chandy *et al.*, 2014).

263 The most abundant bacterial taxa detected in the hospital sewage are different from  
264 those found in the urban and suburban WWTP influent, which are dominated by  
265 bacterial families (*Arcobacter*, *Aeromonadaceae*; *Carnobacteriaceae*) that are commonly  
266 found in the sewer microbiota (Moreno *et al.*, 2003; Vandewalle *et al.*, 2012; Shanks *et*  
267 *al.*, 2013). Compared to the WWTP influent samples, several members of the human gut  
268 microbiota are significantly more abundant in hospital sewage, most probably due to the  
269 close proximity of the sampling location to the hospital sanitation systems. These  
270 human-associated taxa include the genus *Streptococcus*, of which many species  
271 interact with humans either as commensals or pathogens (Kalia *et al.*, 2001), and the  
272 *Ruminococcaceae*, which are one of the most prevalent bacterial families in the human  
273 gut (Arumugam *et al.*, 2011; C. A. Lozupone *et al.*, 2012). These human-associated  
274 bacteria appear to be ill-suited for surviving the complex and, at least partially  
275 oxygenated, sewage environment and progressively decrease in abundance, leading to  
276 lower levels of human gut-associated bacteria in the urban WWTP influent. Because  
277 most ARGs from the human microbiota appear to be carried by non-pathogenic  
278 commensal bacteria (Sommer *et al.*, 2009; Buelow *et al.*, 2014), a general loss of human  
279 commensal bacteria in the sewer system (Pehrsson *et al.*, 2016) may contribute to a  
280 decrease in the abundance of ARGs during the passage of wastewater through the  
281 sewer system.

282 The reduction of ARGs shown in urban WWTP effluent compared to WWTP influent may  
283 be explained by the further significant reduction of the relative abundance of human-

284 associated bacterial taxa detected in urban WWTP effluent. The continuous reduction of  
285 these bacterial taxa could be mediated by their removal through sorption to activated  
286 sludge, by replacement with the bacteria that populate activated sludge, and/or by  
287 predation of protozoa during wastewater treatment (Wen *et al.*, 2009; Calero-Caceres *et*  
288 *al.*, 2014). Interestingly, the presence of Procabacteriales in WWTP effluent and river  
289 water (Figure 1A), may point towards a relatively high abundance of protists in these  
290 samples, as these bacteria are intracellular symbionts or pathogens of amoeba (Horn *et*  
291 *al.*, 2002; Greub & Raoult, 2004).

292 The reduction of the abundance of ARGs from hospital sewage to WWTP effluent  
293 highlights the importance of wastewater treatment in reducing the discharge of ARGs  
294 originating from human sources into the environment. With respect to the abundance of  
295 ARG relative to 16S rRNA, it has been debated whether sewage treatment could  
296 selectively affect the percentage of resistant bacteria within a given species, or within  
297 the total community (Rizzo *et al.*, 2013; Laht *et al.*, 2014; Alexander *et al.*, 2015). Here,  
298 and in line with (Karkman *et al.*, 2016), we observed that wastewater treatment led to a  
299 decrease in the relative abundance of ARGs. A clear decrease of ARGs in absolute  
300 terms (i.e. in gene copies per volume of water) along the sewage treatment has been  
301 shown in a range of publications (Auerbach *et al.*, 2007; Chen & Zhang, 2013; Laht *et*  
302 *al.*, 2014; Czekalski *et al.*, 2014).

303 Sampling for this study was limited to one single season, but was repeated four  
304 consecutive days in dry weather conditions using mostly flow-proportional sampling as  
305 recommended by Ort *et al.* (Ort *et al.*, 2010). Microbiota and resistome profiling of our  
306 samples showed limited variation between the four sampling days for each sample,

307 hence allowing for analysis of the treatment efficacy on the removal of ARGs relative to  
308 16S rRNA in these particular WWTPs.

309 Advanced water treatment methods have been proposed as a selective measure for  
310 hospital wastewater, specifically to decrease pharmaceuticals and the release of  
311 pathogens by hospitals (Lienert *et al.*, 2011). For the investigated municipal WWTP,  
312 hospital wastewater seems to play a limited role for the level of resistance genes in the  
313 influent and effluent. Our findings suggest that -in the presence of operational WWTPs-  
314 hospital-specific sewage treatment will not lead to a substantial further reduction of the  
315 release of ARGs into effluent.

316

317

318

## 319 **Funding**

320 This work was supported by The Netherlands Organisation for Health Research and  
321 Development ZonMw (Priority Medicine Antimicrobial Resistance; grant 205100015) and  
322 by the European Union Seventh Framework Programme (FP7-HEALTH-2011-single-  
323 stage) 'Evolution and Transfer of Antibiotic Resistance' (EvoTAR), under grant  
324 agreement number 282004. In addition, W.v.S is supported by a NWO-VIDI grant  
325 (917.13.357).

326



327 **References**

328 Alexander J, Bollmann A, Seitz W & Schwartz T (2015) Microbiological characterization  
329 of aquatic microbiomes targeting taxonomical marker genes and antibiotic resistance  
330 genes of opportunistic bacteria Sci Total Environ **512-513**: 316-325.

331 Anukool U, Gaze WH & Wellington EM (2004) In situ monitoring of streptothricin  
332 production by *Streptomyces rochei* F20 in soil and rhizosphere Appl Environ Microbiol  
333 **70**: 5222-5228.

334 Arumugam M, Raes J, Pelletier E *et al.* (2011) Enterotypes of the human gut  
335 microbiome Nature **473**: 174-180.

336 Auerbach EA, Seyfried EE & McMahon KD (2007) Tetracycline resistance genes in  
337 activated sludge wastewater treatment plants Water Res **41**: 1143-1151.

338 Benjamini Y & Hochberg Y (1995) Controlling the false discovery rate: a practical and  
339 powerful approach to multiple testing. Journal of the Royal Statistical Society Series B  
340 (Methodological) **Vol. 57, No. 1**: pp. 289-300.

341 Berendonk TU, Manaia CM, Merlin C *et al.* (2015) Tackling antibiotic resistance: the  
342 environmental framework Nat Rev Microbiol **13**: 310-317.

343 Blaak H, de Kruijf P, Hamidjaja RA, van Hoek AH, de Roda Husman AM & Schets FM  
344 (2014) Prevalence and characteristics of ESBL-producing *E. coli* in Dutch recreational  
345 waters influenced by wastewater treatment plants Vet Microbiol **171**: 448-459.

- 346 Bokulich NA, Subramanian S, Faith JJ, Gevers D, Gordon JI, Knight R, Mills DA &  
347 Caporaso JG (2013) Quality-filtering vastly improves diversity estimates from Illumina  
348 amplicon sequencing Nat Methods **10**: 57-59.
- 349 Borjesson S, Dienues O, Jarnheimer PA, Olsen B, Matussek A & Lindgren PE (2009)  
350 Quantification of genes encoding resistance to aminoglycosides, beta-lactams and  
351 tetracyclines in wastewater environments by real-time PCR Int J Environ Health Res **19**:  
352 219-230.
- 353 Brechet C, Plantin J, Sauget M, Thouverez M, Talon D, Cholley P, Guyeux C, Hocquet  
354 D & Bertrand X (2014) Wastewater treatment plants release large amounts of extended-  
355 spectrum beta-lactamase-producing *Escherichia coli* into the environment Clin Infect Dis  
356 **58**: 1658-1665.
- 357 Buelow E, Bello Gonzalez TDJ, Fuentes S *et al.* (2017) Comparative gut microbiota and  
358 resistome profiling of intensive care patients receiving selective digestive tract  
359 decontamination and healthy subjects Microbiome **5**: 88-017-0309-z.
- 360 Buelow E, Gonzalez TB, Versluis D *et al.* (2014) Effects of selective digestive  
361 decontamination (SDD) on the gut resistome J Antimicrob Chemother. **69**: 2215-23
- 362 Bush K, Courvalin P, Dantas G *et al.* (2011) Tackling antibiotic resistance Nat Rev  
363 Microbiol **9**: 894-896.
- 364 Calero-Caceres W, Melgarejo A, Colomer-Lluch M, Stoll C, Lucena F, Jofre J & Muniesa  
365 M (2014) Sludge as a potential important source of antibiotic resistance genes in both  
366 the bacterial and bacteriophage fractions Environ Sci Technol **48**: 7602-7611.

- 367 Caporaso JG, Bittinger K, Bushman FD, DeSantis TZ, Andersen GL & Knight R (2010)  
368 PyNAST: a flexible tool for aligning sequences to a template alignment *Bioinformatics*  
369 **26**: 266-267.
- 370 Caporaso JG, Kuczynski J, Stombaugh J *et al.* (2010) QIIME allows analysis of high-  
371 throughput community sequencing data *Nat Methods* **7**: 335-336.
- 372 Chandy SJ, Naik GS, Charles R, Jeyaseelan V, Naumova EN, Thomas K & Lundborg  
373 CS (2014) The impact of policy guidelines on hospital antibiotic use over a decade: a  
374 segmented time series analysis *PLoS One* **9**: e92206.
- 375 Chen H & Zhang M (2013) Occurrence and removal of antibiotic resistance genes in  
376 municipal wastewater and rural domestic sewage treatment systems in eastern China  
377 *Environ Int* **55**: 9-14.
- 378 Czekalski N, Gascon Diez E & Burgmann H (2014) Wastewater as a point source of  
379 antibiotic-resistance genes in the sediment of a freshwater lake *ISME J* **8**: 1381-1390.
- 380 DeSantis TZ, Hugenholtz P, Larsen N, Rojas M, Brodie EL, Keller K, Huber T, Dalevi D,  
381 Hu P & Andersen GL (2006) Greengenes, a chimera-checked 16S rRNA gene database  
382 and workbench compatible with ARB *Appl Environ Microbiol* **72**: 5069-5072.
- 383 Diwan V, Tamhankar AJ, Khandal RK, Sen S, Aggarwal M, Marothi Y, Iyer RV,  
384 Sundblad-Tonderski K & Stalsby-Lundborg C (2010) Antibiotics and antibiotic-resistant  
385 bacteria in waters associated with a hospital in Ujjain, India *BMC Public Health* **10**: 414-  
386 2458-10-414.

- 387 Edgar RC (2010) Search and clustering orders of magnitude faster than BLAST  
388 *Bioinformatics* **26**: 2460-2461.
- 389 Edgar RC, Haas BJ, Clemente JC, Quince C & Knight R (2011) UCHIME improves  
390 sensitivity and speed of chimera detection *Bioinformatics* **27**: 2194-2200.
- 391 Fadrosch DW, Ma B, Gajer P, Sengamalay N, Ott S, Brotman RM & Ravel J (2014) An  
392 improved dual-indexing approach for multiplexed 16S rRNA gene sequencing on the  
393 Illumina MiSeq platform *Microbiome* **2**: 6-2618-2-6.
- 394 Godon JJ, Zumstein E, Dabert P, Habouzit F & Moletta R (1997) Molecular microbial  
395 diversity of an anaerobic digester as determined by small-subunit rDNA sequence  
396 analysis *Appl Environ Microbiol* **63**: 2802-2813.
- 397 Greub G & Raoult D (2004) Microorganisms resistant to free-living amoebae *Clin*  
398 *Microbiol Rev* **17**: 413-433.
- 399 Harris S, Morris C, Morris D, Cormican M & Cummins E (2014) Antimicrobial resistant  
400 *Escherichia coli* in the municipal wastewater system: effect of hospital effluent and  
401 environmental fate *Sci Total Environ* **468-469**: 1078-1085.
- 402 Harris S, Morris C, Morris D, Cormican M & Cummins E (2013) The effect of hospital  
403 effluent on antimicrobial resistant *E. coli* within a municipal wastewater system *Environ*  
404 *Sci Process Impacts* **15**: 617-622.
- 405 Horn M, Fritsche TR, Linner T, Gautom RK, Harzenetter MD & Wagner M (2002)  
406 Obligate bacterial endosymbionts of *Acanthamoeba* spp. related to the beta-

- 407 Proteobacteria: proposal of '*Candidatus Procabacter acanthamoebae*' *gen. nov., sp. nov*  
408 Int J Syst Evol Microbiol **52**: 599-605.
- 409 Kalia A, Enright MC, Spratt BG & Bessen DE (2001) Directional gene movement from  
410 human-pathogenic to commensal-like streptococci Infect Immun **69**: 4858-4869.
- 411 Karkman A, Do TT, Walsh F & Virta MPJ (2017) Antibiotic-Resistance Genes in Waste  
412 Water Trends Microbiol. pii: S0966-842X(17)30210-X.
- 413 Karkman A, Johnson TA, Lyra C, Stedtfeld RD, Tamminen M, Tiedje JM & Virta M  
414 (2016) High-throughput quantification of antibiotic resistance genes from an urban  
415 wastewater treatment plant FEMS Microbiol Ecol **92**: 10.1093/femsec/fiw014. Epub  
416 2016 Jan 31.
- 417 Kummerer K (2001) Drugs in the environment: emission of drugs, diagnostic aids and  
418 disinfectants into wastewater by hospitals in relation to other sources--a review  
419 Chemosphere **45**: 957-969.
- 420 Laht M, Karkman A, Voolaid V, Ritz C, Tenson T, Virta M & Kisand V (2014)  
421 Abundances of tetracycline, sulphonamide and beta-lactam antibiotic resistance genes  
422 in conventional wastewater treatment plants (WWTPs) with different waste load PLoS  
423 One **9**: e103705.
- 424 LaPara TM, Burch TR, McNamara PJ, Tan DT, Yan M & Eichmiller JJ (2011) Tertiary-  
425 treated municipal wastewater is a significant point source of antibiotic resistance genes  
426 into Duluth-Superior Harbor Environ Sci Technol **45**: 9543-9549.

- 427 Lienert J, Koller M, Konrad J, McArdell CS & Schuwirth N (2011) Multiple-criteria  
428 decision analysis reveals high stakeholder preference to remove pharmaceuticals from  
429 hospital wastewater Environ Sci Technol **45**: 3848-3857.
- 430 Lozupone C & Knight R (2005) UniFrac: a new phylogenetic method for comparing  
431 microbial communities Appl Environ Microbiol **71**: 8228-8235.
- 432 Lozupone CA, Stombaugh JI, Gordon JI, Jansson JK & Knight R (2012) Diversity,  
433 stability and resilience of the human gut microbiota Nature **489**: 220-230.
- 434 Magoc T & Salzberg SL (2011) FLASH: fast length adjustment of short reads to improve  
435 genome assemblies Bioinformatics **27**: 2957-2963.
- 436 McDonald D, Price MN, Goodrich J, Nawrocki EP, DeSantis TZ, Probst A, Andersen GL,  
437 Knight R & Hugenholtz P (2012) An improved Greengenes taxonomy with explicit ranks  
438 for ecological and evolutionary analyses of bacteria and archaea ISME J **6**: 610-618.
- 439 Moreno Y, Botella S, Alonso JL, Ferrus MA, Hernandez M & Hernandez J (2003)  
440 Specific detection of *Arcobacter* and *Campylobacter* strains in water and sewage by  
441 PCR and fluorescent in situ hybridization Appl Environ Microbiol **69**: 1181-1186.
- 442 Ort C, Lawrence MG, Rieckermann J & Joss A (2010) Sampling for pharmaceuticals and  
443 personal care products (PPCPs) and illicit drugs in wastewater systems: are your  
444 conclusions valid? A critical review Environ Sci Technol **44**: 6024-6035.
- 445 Pehrsson EC, Tsukayama P, Patel S *et al.* (2016) Interconnected microbiomes and  
446 resistomes in low-income human habitats Nature **533**: 212-216.

- 447 Price MN, Dehal PS & Arkin AP (2010) FastTree 2--approximately maximum-likelihood  
448 trees for large alignments PLoS One **5**: e9490.
- 449 Pruden A (2014) Balancing water sustainability and public health goals in the face of  
450 growing concerns about antibiotic resistance Environ Sci Technol **48**: 5-14.
- 451 Pruden A, Larsson DG, Amezquita A *et al.* (2013) Management options for reducing the  
452 release of antibiotics and antibiotic resistance genes to the environment Environ Health  
453 Perspect **121**: 878-885.
- 454 Rajilic-Stojanovic M & de Vos WM (2014) The first 1000 cultured species of the human  
455 gastrointestinal microbiota FEMS Microbiol Rev **38**: 996-1047.
- 456 Rizzo L, Manaia C, Merlin C, Schwartz T, Dagot C, Ploy MC, Michael I & Fatta-Kassinos  
457 D (2013) Urban wastewater treatment plants as hotspots for antibiotic resistant bacteria  
458 and genes spread into the environment: a review Sci Total Environ **447**: 345-360.
- 459 Robert J, Pean Y, Varon E *et al.* (2012) Point prevalence survey of antibiotic use in  
460 French hospitals in 2009 J Antimicrob Chemother **67**: 1020-1026.
- 461 Shanks OC, Newton RJ, Kelty CA, Huse SM, Sogin ML & McLellan SL (2013)  
462 Comparison of the microbial community structures of untreated wastewaters from  
463 different geographic locales Appl Environ Microbiol **79**: 2906-2913.
- 464 Sommer MO, Dantas G & Church GM (2009) Functional characterization of the antibiotic  
465 resistance reservoir in the human microflora Science **325**: 1128-1131.

- 466 Stalder T, Barraud O, Jove T, Casellas M, Gaschet M, Dagot C & Ploy MC (2014)  
467 Quantitative and qualitative impact of hospital effluent on dissemination of the integron  
468 pool ISME J **8**: 768-777.
- 469 Stalder T, Alrhoun M, Louvet JN, Casellas M, Maftah C, Carrion C, Pons MN, Pahl O,  
470 Ploy MC & Dagot C (2013) Dynamic assessment of the floc morphology, bacterial  
471 diversity, and integron content of an activated sludge reactor processing hospital effluent  
472 Environ Sci Technol **47**: 7909-7917.
- 473 Vandewalle JL, Goetz GW, Huse SM, Morrison HG, Sogin ML, Hoffmann RG, Yan K &  
474 McLellan SL (2012) *Acinetobacter*, *Aeromonas* and *Trichococcus* populations dominate  
475 the microbial community within urban sewer infrastructure Environ Microbiol **14**: 2538-  
476 2552.
- 477 Varela AR, Andre S, Nunes OC & Manaia CM (2014) Insights into the relationship  
478 between antimicrobial residues and bacterial populations in a hospital-urban wastewater  
479 treatment plant system Water Res **54**: 327-336.
- 480 Varela AR, Ferro G, Vredenburg J, Yanik M, Vieira L, Rizzo L, Lameiras C & Manaia CM  
481 (2013) Vancomycin resistant *enterococci*: from the hospital effluent to the urban  
482 wastewater treatment plant Sci Total Environ **450-451**: 155-161.
- 483 Vazquez-Baeza Y, Pirrung M, Gonzalez A & Knight R (2013) EMPeror: a tool for  
484 visualizing high-throughput microbial community data Gigascience **2**: 16-217X-2-16.



485 Vlahovic-Palcevski V, Dumpis U, Mitt P, Gulbinovic J, Struwe J, Palcevski G, Stimac D,  
486 Lagergren A & Bergman U (2007) Benchmarking antimicrobial drug use at university  
487 hospitals in five European countries Clin Microbiol Infect **13**: 277-283.

488 Wellington EM, Boxall AB, Cross P *et al.* (2013) The role of the natural environment in  
489 the emergence of antibiotic resistance in gram-negative bacteria Lancet Infect Dis **13**:  
490 155-165.

491 Wen Q, Tutuka C, Keegan A & Jin B (2009) Fate of pathogenic microorganisms and  
492 indicators in secondary activated sludge wastewater treatment plants J Environ Manage  
493 **90**: 1442-1447.

494 Woolhouse ME & Ward MJ (2013) Microbiology. Sources of antimicrobial resistance  
495 Science **341**: 1460-1461.

496 Zhang T, Shao MF & Ye L (2012) 454 Pyrosequencing Reveals Bacterial Diversity of  
497 Activated Sludge from 14 Sewage Treatment Plants ISME J **6**: 1137-1147.

498

Figure 1

a

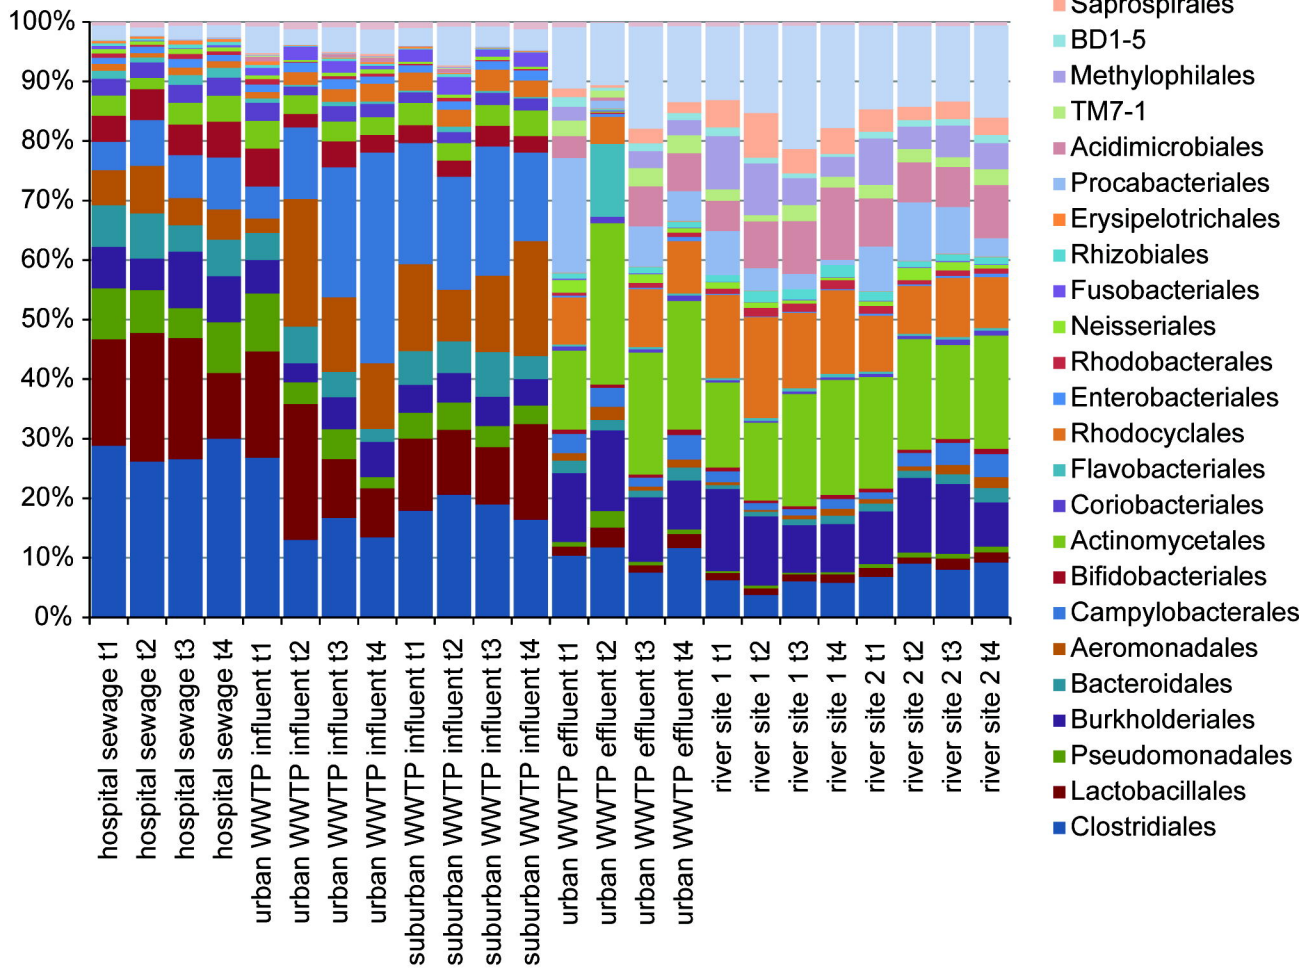

b

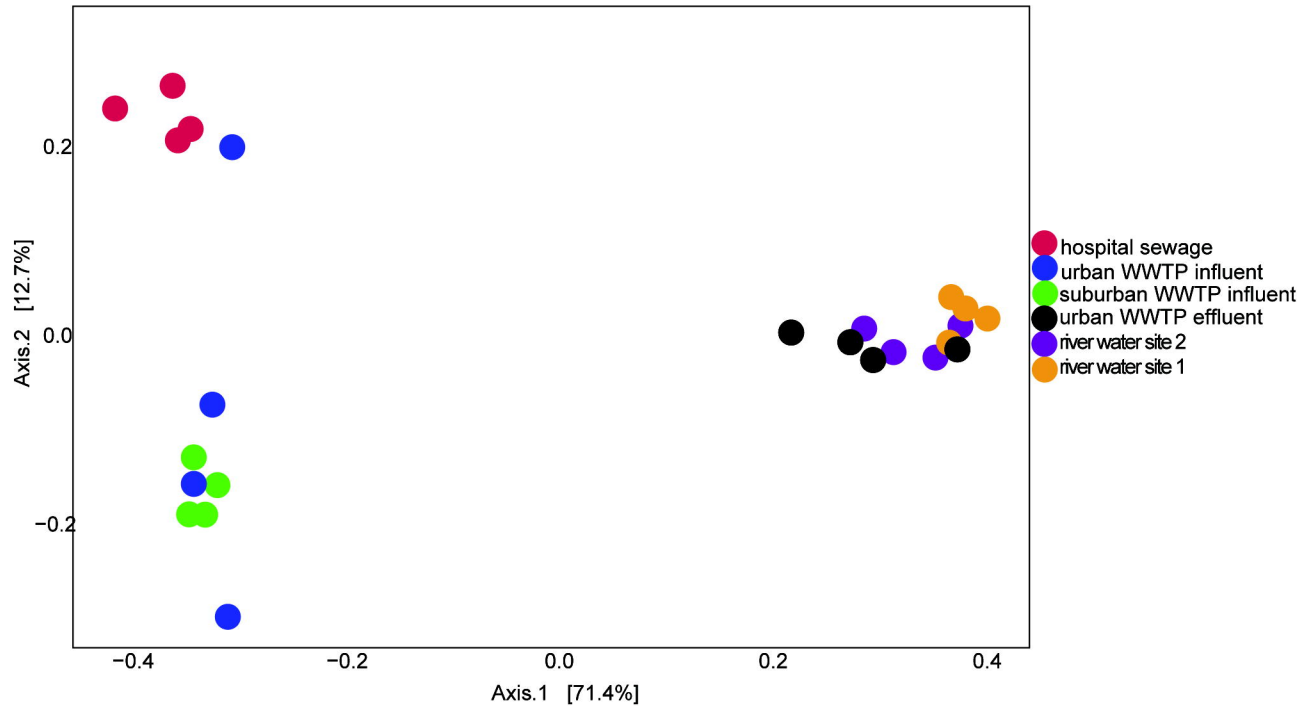



**Figure 1: Microbiota composition of the sample locations at different time points. A:** Relative abundance of bacteria at the order level in different samples as detected by dual indexing 16S rRNA Illumina MiSeq sequencing. The 24 most abundant bacteria at the order level for all samples are depicted, where the “other” represents percentage of the remaining taxa and “Unassigned” shows percentage of OTUs that could not be assigned to any known taxonomy. The different sampling time points are indicated as t1 (Monday 31 March 2014); t2 (Wednesday 2 April 2014); t3 (Monday 7 April 2014); t4 (Monday 14 April 2014). **B:** Principal coordinates analysis (PCoA) of microbiota composition for all different locations and time points. PCoA based on the weighted UniFrac distance depicts the differences in microbiota compositions.

**Figure 2: Abundance levels of ARGs in hospital, WWTP influent, WWTP effluent and river water.**

16S rRNA - normalized abundance of ARGs detected in all samples. ARGs are grouped according to resistance gene families (aminoglycosides; B, bacitracin,  $\beta$ -lactams; C, chloramphenicols; macrolide / intrinsic resistance; P, polymyxins; Pu, puromycins; Qa, QAC resistance genes; Qi, quinolones; St, streptogramins; Su, sulphonamides; tetracyclines; Tr, trimethoprim; V, vancomycin). The colour scale ranges from bright red (most abundant) to bright yellow (least abundant). White blocks indicate that a resistance gene was not detected. The different sampling time points are indicated as t1 (Monday 31 March 2014); t2 (Wednesday 2 April 2014); t3 (Monday, 7 April 2014); t4 (Monday, 14 April 2014).
